# Supplementary material for: Combining PPI with qualitative research to engage ‘harder-to-reach’ populations: service user groups as co-applicants on a platform study for a trial
Source: PubMed Central journal article supplement (PMC5611582; doi:10.1186/s40900-016-0023-1), 2016-03-24
Supplement: 40900_2016_23_MOESM1_ESM.pdf [file 40900_2016_23_MOESM1_ESM.pdf]

To be completed  
by researcher:

|            |      |               |
|------------|------|---------------|
| Researcher | Area | Mother's Code |
|            |      |               |

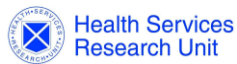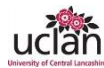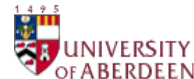

**BIBS: Benefits of Incentives for Breastfeeding and Smoking cessation  
Pregnant women/new mothers**

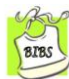

***Please can you complete the following details about yourself:***

**\*Please delete as appropriate**

**1) Your age:**

|  |  |
|--|--|
|  |  |
|--|--|

**2) The first four digits of your postcode:**

|  |  |  |  |
|--|--|--|--|
|  |  |  |  |
|--|--|--|--|

**3) Please record your relationship status by ticking the appropriate box:**

| <i>Marital Status</i>                     | <i>Please tick the box that applies</i> |
|-------------------------------------------|-----------------------------------------|
| Married                                   |                                         |
| Living together                           |                                         |
| In relationship (but not living together) |                                         |
| Single                                    |                                         |
| Widowed                                   |                                         |
| Divorced/separated                        |                                         |
| Civil partnership                         |                                         |

**4) Please record your ethnic background by ticking the appropriate box:**

| <i>Ethnic Background</i> |                           | <i>Please tick the box that applies</i> |
|--------------------------|---------------------------|-----------------------------------------|
| White                    | White British             |                                         |
|                          | Irish                     |                                         |
|                          | Other white background    |                                         |
| Mixed Race               | White and black Caribbean |                                         |
|                          | White and black African   |                                         |
|                          | White and Asian           |                                         |
|                          | Other mixed background    |                                         |
| Asian/Asian British      | Indian                    |                                         |
|                          | Pakistani                 |                                         |
|                          | Bangladeshi               |                                         |
|                          | Other Asian background    |                                         |

|                                |                        |  |
|--------------------------------|------------------------|--|
| Black or Black British         | Caribbean              |  |
|                                | African                |  |
|                                | Other Black background |  |
| Chinese or Other Ethnic Groups | Chinese                |  |
|                                | Other ethnic group     |  |

**5) Please record your highest qualification by ticking the appropriate box:**

| <i>Qualification</i>                                                                                               | <i>Please tick the box that applies</i> |
|--------------------------------------------------------------------------------------------------------------------|-----------------------------------------|
| O Grade, Standard Grade, Access 3 Cluster, Intermediate 1 or 2, GCSE, CSE, Senior Certificate or equivalent        |                                         |
| SCE Higher Grade, Higher, Advanced Higher, CSYS, A Level, AS Level, Advanced Senior Certificate or equivalent      |                                         |
| GSVQ Foundation or Intermediate, SVQ level 1 or 2, SCOTVEC Module, City and Guilds Craft or equivalent             |                                         |
| GSVQ Advanced, SVQ level 3, ONC, OND, SCOTVEC National Diploma, City and Guilds Advanced Craft or equivalent       |                                         |
| HNC, HND, SVQ level 4 or equivalent                                                                                |                                         |
| Degree, Postgraduate qualifications, Masters, PhD, SVQ level 5 or equivalent                                       |                                         |
| Professional qualifications (for example, teaching, nursing, accountancy)                                          |                                         |
| Other school qualifications not already mentioned (including foreign qualifications)                               |                                         |
| Other post-school but pre-Higher Education qualifications not already mentioned (including foreign qualifications) |                                         |
| Other Higher Education qualifications not already mentioned (including foreign qualifications)                     |                                         |
| No qualifications                                                                                                  |                                         |

**6) What is your current occupation/job:**

---



---

**7) When is your baby due (or if your baby has been born)? Please provide the month and year**

|   |   |   |   |
|---|---|---|---|
| M | M | Y | Y |
|---|---|---|---|

**8) Where do you intend to/did you give birth\* (we would like this information in order to know under which NHS organisation your maternity care is registered)?**

---

**9) How many 'other' (e.g. older) children do you have?**

**10) Smoking history:**

*Please answer the following questions by ticking the appropriate boxes*

**a) Have you ever smoked cigarettes?**

Yes (*if yes, please go to question b*)

No (*if no, please go to question g*)

**b) Have you smoked at all in the last two years?**

Yes (*if yes, please go to question c*)

No (*if no, please go to question e*)

**c) Do you smoke cigarettes at all now?**

Yes (*if yes, please go to question d*)

No (*if no, please go to question e*)

**d) Did you/have you smoked cigarettes at all during your most recent pregnancy, after you found out you were pregnant?**

Yes (*if yes, please go to question f*)

No (*if no, please go to question g*)

**e) When did you finally give up? Please tick one box only (and then go to question g)**

Before you knew you were pregnant

As soon as you found out you were pregnant

Later on during your pregnancy

After the birth

**f) Since you knew about your most recent pregnancy, did you do any of the following DURING your pregnancy?**

*Please tick one or more boxes (then go to question g)*

Cut down

Gave up but started again

Increased the amount you smoked

None of the above

**g) During your most recent pregnancy, did any of the people you lived with smoke cigarettes?**

*Please tick one or more boxes (then go to question h)*

Yes, my partner smoked

Yes, someone else I lived with smoked

No, nobody else who I lived with smoked

Not applicable – I lived alone

**h) Do any of the people who live with you now smoke cigarettes?**

*Please tick one or more boxes*

- Yes, my partner smokes
- Yes, someone else I live with smokes
- No, nobody else who I live with smokes
- Not applicable – I live alone with my baby

**11) Feeding history**

*If you are pregnant at the moment please go to question a) – if you have recently had a baby, please go to question b)*

**a) If you are pregnant now, how do you plan to feed him/her? (Please tick one of the boxes and then go to question e)**

- Infant formula feed
- Breastfeed
- Breastfeed and infant formula feed
- Have not decided

**b) If you have recently had a baby - thinking about the milk that your baby has been given over the last 7 days has he/she had... (please tick one of the boxes and then go to question c)**

- Only breast milk
- Only infant formula milk
- Breast milk and infant formula milk

**c) Has your recent baby EVER been given infant formula milk, even if this was only once? (please tick one of the boxes and then go to question d)**

- Yes (even if only once)
- No

**d) Has your recent baby EVER been given breast milk or have you put your baby to the breast, even if this was only once? (please tick one of the boxes and then go to question e)**

- Yes (even if only once)
- No

e) **If you have any older children – did you breastfeed any of your older children?**  
Yes / No / Not Applicable\*

*If you answered yes – please can you record the longest amount of time any of your children were breastfed for? (please indicate how many days, weeks, months or years as appropriate in the box below):*

| Days | Weeks | Months | Years |
|------|-------|--------|-------|
|      |       |        |       |

**12) Experience of incentives**

**Have you ever been part of an ‘incentive’ scheme which provides you with gifts or services to help you to change any lifestyle behaviour?**

Yes / No\*

*If you answered yes please detail below which lifestyle behaviour the incentive scheme was targeting?*

---

*Please can you tell the researcher more about the incentive scheme during the discussion*

**THANK YOU FOR COMPLETING THIS FORM**
